# Supplementary material for: Genotyping of Croatian Olive Germplasm with Consensus SSR Markers
Source: MDPI journal article supplement (doi:10.3390/horticulturae10040417), 2024-04-20
Supplement: s1 [file s1]

**Note:**

This file is the integral part of the paper Bolarić et al. (2024) "Genotyping of Croatian olive germplasm with consensus SSR markers" published as supplementary material [MDPI Horticulturae, 2024]

**Table S1.** Final concentrations of components in PCR reactions specified for each SSR primer pair.

| PCR components |                                      | SSR primers                   |        |                                                           |
|----------------|--------------------------------------|-------------------------------|--------|-----------------------------------------------------------|
|                |                                      | DCA3,<br>GAPU101,<br>GAPU103A | DCA9   | DCA5, DCA14,<br>DCA16, DCA18,<br>UDO43, EMO90,<br>GAPU71B |
| 1x PCR buffer  | Tris-HCl <i>pH</i> 8.3               | 10 mM                         | 10 mM  | 10 mM                                                     |
|                | KCl                                  | 50 mM                         | 50 mM  | 50 mM                                                     |
|                | MgCl <sup>2</sup>                    | 1.5 mM                        | 3.0 mM | 1.5 mM                                                    |
|                | dNTP <sup>1</sup>                    | 0.2 mM                        | 0.2 mM | 0.2 mM                                                    |
|                | primer forward <sup>2</sup>          | 0.8 µM                        | 0.8 µM | 0.8 µM                                                    |
|                | primer reverse <sup>2</sup>          | 0.8 µM                        | 0.8 µM | 0.8 µM                                                    |
|                | <i>Taq</i> polymerase <sup>1</sup>   | 0.5 U                         | 0.5 U  | 0.5 U                                                     |
|                | genomic DNA (5 ng µl <sup>-1</sup> ) | 20 ng                         | 20 ng  | 20 ng                                                     |
|                | Tween 20 <sup>1</sup>                | -                             | -      | 0.01%                                                     |
|                | betaine monohydrate <sup>1</sup>     | -                             | -      | 0.54 M                                                    |
|                | dithiothreitol (100 mM) <sup>1</sup> | -                             | -      | 1.34 mM                                                   |
|                | dimethyl sulfoxide <sup>1</sup>      | -                             | -      | 1.34%                                                     |

<sup>1</sup>Sigma-Aldrich, USA; <sup>2</sup>Applied Biosystems, USA
